# Supplementary material for: Cultivation of Bacteria From Aplysina aerophoba: Effects of Oxygen and Nutrient Gradients
Source: PubMed Central journal article supplement (PMC7042410; doi:10.3389/fmicb.2020.00175), 2020-02-19
Supplement: Image_1.pdf [file Image_1.pdf]

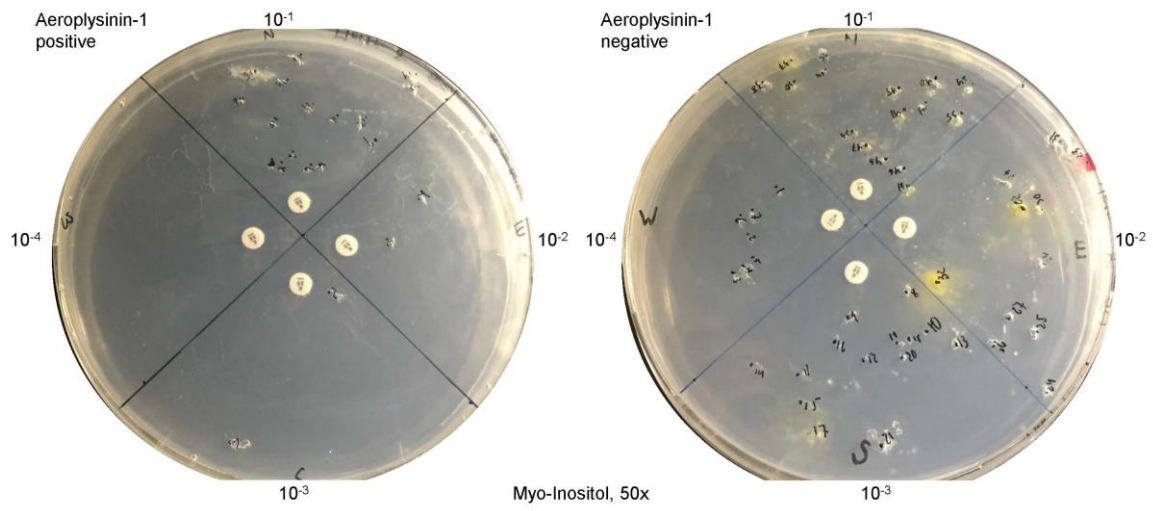

**Supplementary Figure S1:** Example of aerophysinin-1 (AP) effect on colony number, size and morphology on two Plates containing the same medium.
