# Supplementary material for: Cultivation of Bacteria From Aplysina aerophoba: Effects of Oxygen and Nutrient Gradients
Source: PubMed Central journal article supplement (PMC7042410; doi:10.3389/fmicb.2020.00175), 2020-02-19
Supplement: Image_2.pdf [file Image_2.pdf]

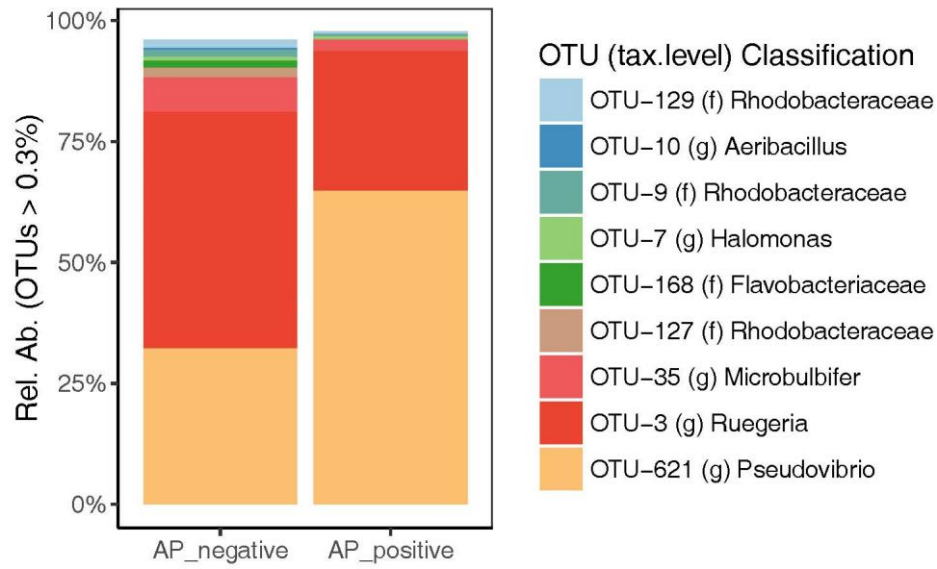

**Supplementary Figure S2:** Relative abundances of the most abundant taxa from the Plates, grouped from incubation without (AP\_negative) and with (AP\_positive) aeropylsinin-1.
