# Supplementary material for: Cultivation of Bacteria From Aplysina aerophoba: Effects of Oxygen and Nutrient Gradients
Source: PubMed Central journal article supplement (PMC7042410; doi:10.3389/fmicb.2020.00175), 2020-02-19
Supplement: Image_3.pdf [file Image_3.pdf]

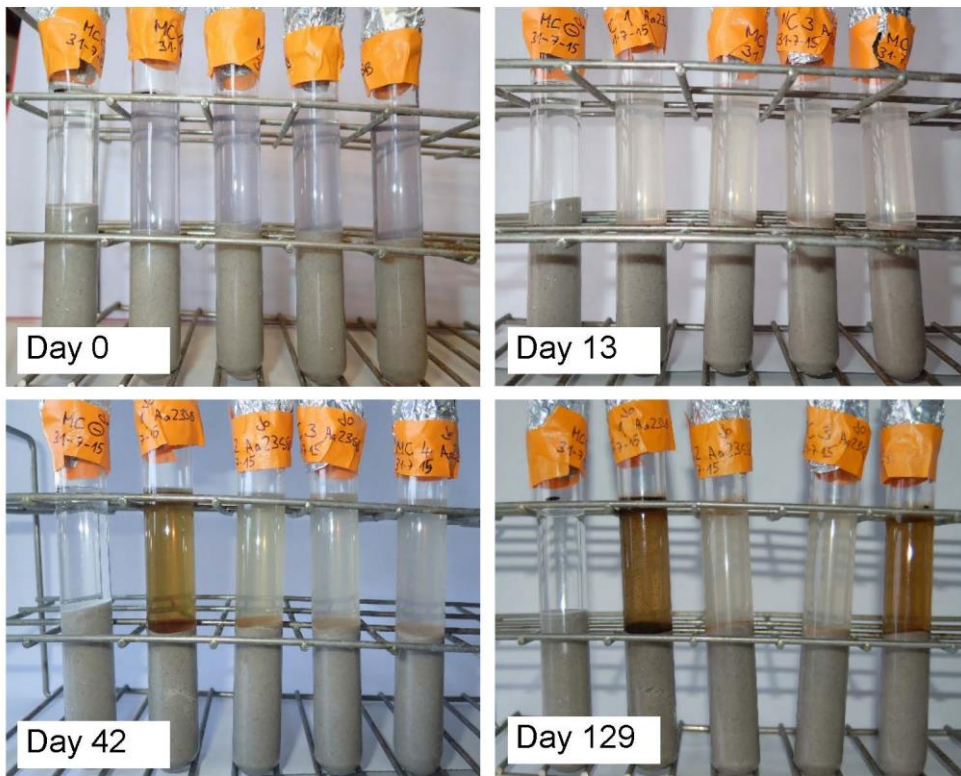

**Supplementary Figure S3:** Photographs of the MiniColumn cultivation experiment over time.
