# Supplementary material for: Cultivation of Bacteria From Aplysina aerophoba: Effects of Oxygen and Nutrient Gradients
Source: PubMed Central journal article supplement (PMC7042410; doi:10.3389/fmicb.2020.00175), 2020-02-19
Supplement: Image_4.pdf [file Image_4.pdf]

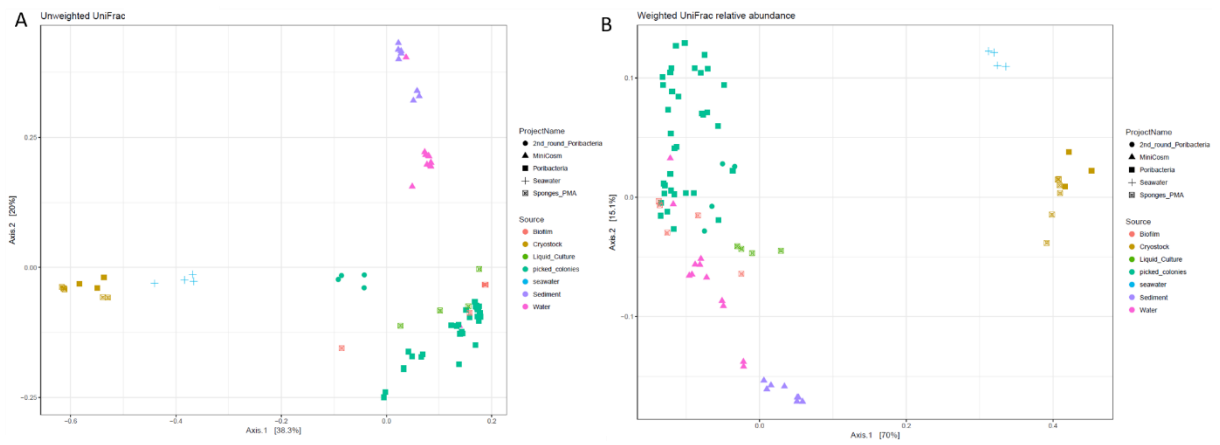

**Supplementary Figure S4:** PCoA analysis on unweighted (A) and weighted (B) UniFrac distances of the prokaryotic communities obtained from different cultivation experiments and the sponge inocula.
